# Supplementary material for: Ni(II)-Salophen—Comprehensive Analysis on Electrochemical and Spectral Characterization and Biological Studies
Source: MDPI journal article supplement (doi:10.3390/molecules28145464), 2023-07-17
Supplement: s1 [file s1]

# Ni(II)-salophen - new aspects on electrochemical and spectral characterization and biological studies

Francis Aurelien Ngounoue Kamga, Madalina-Marina Hrubaru, Oana Enache, Elena Diacu, Constantin Draghici, Victorita Tecuceanu, Eleonora-Mihaela Ungureanu, Stephanie Nkemone and Peter Teke Ndifon

**Table S1.** Potential (E) and current (i) of the anodic (a1-a2), cathodic (c1-c2), and their related peaks in the reverse scans from CV and DPV, and half-wave potential ( $E_{1/2}$ ) from RDE experiments for H<sub>2</sub>L (1 mM in 0.1 M TBAP/CH<sub>3</sub>CN).

| Peak\ Parameter | $E_{cv}(V)$ | $i_{cv}(A)$            | $E_{DPV}(V)$ | $i_{DPV}(A)$          | $E_{1/2}(V)$ |
|-----------------|-------------|------------------------|--------------|-----------------------|--------------|
| a1              | 0.820       | $2.56 \times 10^{-5}$  | 0.766        | $5.87 \times 10^{-6}$ | -            |
| a2              | 1.623       | $9.51 \times 10^{-5}$  | 1.517        | $4.13 \times 10^{-6}$ | -            |
| a1'             | 0.409       | $-4.65 \times 10^{-6}$ | -            | -                     | -            |
| c1              | -1.958      | $5.26 \times 10^{-5}$  | -1.898       | $8.97 \times 10^{-6}$ | -1.931       |
| c2              | -2.698      | $8.04 \times 10^{-5}$  | -2.231       | $2.11 \times 10^{-6}$ | -            |
| c1'             | -1.962      | $-2.71 \times 10^{-6}$ | -            | -                     | -            |
| c2'             | -2.417      | $-7.14 \times 10^{-6}$ | -            | -                     | -            |

**Table S2.** Influence of the scan rate on the potential (E) and current (i) of the anodic (a1-a2) and cathodic (c1- c2) peaks in CV scans for H<sub>2</sub>L (1 mM in 0.1 M TBAP/ CH<sub>3</sub>CN).

| $v(V.s^{-1})$ | $E_{c1}(V)$ | $i_{c1}(A)$           | $E_{a1}(V)$ | $i_{a1}(A)$           | $E_{a1'}(V)$ | $i_{a1'}(A)$           | $E_{c2}(V)$ | $i_{c2}(V)$           |
|---------------|-------------|-----------------------|-------------|-----------------------|--------------|------------------------|-------------|-----------------------|
| 0.05          | -1.923      | $3.49 \times 10^{-5}$ | 0.436       | $7.18 \times 10^{-6}$ | 0.412        | $3.33 \times 10^{-7}$  | 0.752       | $2.29 \times 10^{-5}$ |
| 0.1           | -1.941      | $4.87 \times 10^{-5}$ | 0.447       | $9.37 \times 10^{-6}$ | 0.409        | $-5.49 \times 10^{-7}$ | 0.760       | $3.09 \times 10^{-5}$ |
| 0.2           | -1.954      | $6.46 \times 10^{-5}$ | 0.464       | $1.32 \times 10^{-5}$ | 0.405        | $-1.72 \times 10^{-6}$ | 0.774       | $4.32 \times 10^{-5}$ |
| 0.3           | -1.962      | $7.78 \times 10^{-5}$ | 0.477       | $1.66 \times 10^{-5}$ | 0.400        | $-2.57 \times 10^{-6}$ | 0.779       | $5.25 \times 10^{-5}$ |
| 0.5           | -1.967      | $1.08 \times 10^{-4}$ | 0.502       | $2.38 \times 10^{-5}$ | 0.391        | $-4.70 \times 10^{-6}$ | 0.798       | $7.25 \times 10^{-5}$ |

**Table S3.** Potential (E) and current (i) of the anodic (a1-a2), cathodic (c1-c2), and their related peaks in the reverse scans from CV and DPV, and half-wave potential ( $E_{1/2}$ ) from RDE experiments for Ni(II)L complex (0.4 mM in 0.1 M TBAP/CH<sub>3</sub>CN).

| Peak\ Parameter | $E_{cv}(V)$ | $i_{cv}(A)$            | $E_{DPV}(V)$ | $i_{DPV}(A)$           | $E_{1/2}(V)$ |
|-----------------|-------------|------------------------|--------------|------------------------|--------------|
| a1              | 0.714       | $3.351 \times 10^{-5}$ | 0.609        | $1.095 \times 10^{-5}$ | -            |
| a2              | -           | -                      | 0.921        | $5.577 \times 10^{-5}$ | -            |
| a1'             | -0.420      | $2.034 \times 10^{-5}$ | -            | -                      | -            |
| a3              | -           | -                      | 1.163        | $4.129 \times 10^{-6}$ | -            |
| a4              | 1.525       | $6.244 \times 10^{-5}$ | 1.432        | $4.903 \times 10^{-6}$ | -            |
| a5              | 1.773       | $9.230 \times 10^{-5}$ | 1.639        | $6.25 \times 10^{-6}$  | -            |
| c1              | -1.817      | $1.728 \times 10^{-5}$ | -1.788       | $4.171 \times 10^{-6}$ | -1.784       |
| c2              | -2.466      | $1.907 \times 10^{-5}$ | -2.446       | $7.298 \times 10^{-6}$ | -            |
| c1'             | -1.750      | $3.570 \times 10^{-5}$ | -            | -                      | -            |
| c2'             | -2.354      | $-5.51 \times 10^{-5}$ | -            | -                      | -            |

**Table S4.** Influence of the scan rate on the potential (E) and current (i) of a1 and a1'peaks in anodic scans and c1 peak in cathodic scans in CV experiments for Ni(II)L complex (0.4 mM in 0.1 M TBAP/CH<sub>3</sub>CN).

| $v(V.s^{-1})$ | $E_{c1}(V)$ | $-i_{c1}(A)$          | $E_{a1}(V)$ | $i_{a1}(A)$           | $E_{a1'}(V)$ | $i_{a1'}(A)$           |
|---------------|-------------|-----------------------|-------------|-----------------------|--------------|------------------------|
| 0.05          | -1.810      | $1.25 \times 10^{-5}$ | 0.680       | $4.67 \times 10^{-5}$ | 0.368        | $-1.21 \times 10^{-5}$ |
| 0.1           | -1.820      | $1.91 \times 10^{-5}$ | 0.705       | $6.52 \times 10^{-5}$ | 0.371        | $-2.25 \times 10^{-5}$ |
| 0.2           | -1.823      | $2.45 \times 10^{-5}$ | 0.727       | $8.95 \times 10^{-5}$ | 0.367        | $-2.91 \times 10^{-5}$ |
| 0.3           | -1.834      | $3.01 \times 10^{-5}$ | 0.755       | $1.11 \times 10^{-4}$ | 0.366        | $-4.37 \times 10^{-5}$ |
| 0.5           | -1.837      | $4.04 \times 10^{-5}$ | 0.798       | $1.43 \times 10^{-4}$ | 0.347        | $-6.64 \times 10^{-5}$ |

**Table S5.** Equations for the dependences of peak potential (Ep) and peak current (ip) on the scan rate v (in V/s) and their correlation coefficients for a1, a1', a2, and c1 peaks for H<sub>2</sub>L, according to Figure 4a.

| Peak | Equation for Ep (V) vs log v      | Correlation coefficient |
|------|-----------------------------------|-------------------------|
| a1   | Epa1 (V) = 0.507 + 0.062 · log v  | 0.974                   |
| a1'  | Epa1' (V) = 0.378 - 0.022 · log v | -0.946                  |
| a2   | Epa2 (V) = 0.820 + 0.029 · log v  | 0.964                   |
| c1   | Epc1 (V) = -1.977 - 0.044 · log v | -0.985                  |

**Table S6.** Equations for the dependences of peak current (ip) on the square root of the scan rate v (in V/s) and their correlation coefficients for a1, a1', a2, and c1 peaks for H<sub>2</sub>L, according to Figure 4b.

| Peak | Equation for ip(A) vs v <sup>1/2</sup>                                            | Correlation coefficient |
|------|-----------------------------------------------------------------------------------|-------------------------|
| a1   | ipa1(A) = -1.252 · 10 <sup>-6</sup> + 3.412 · 10 <sup>-5</sup> · v <sup>1/2</sup> | 0.992                   |
| a1'  | ipa1'(A) = 2.120 · 10 <sup>-6</sup> - 9.143 · 10 <sup>-6</sup> · v <sup>1/2</sup> | -0.980                  |
| a2   | ipa2(A) = -1.041 · 10 <sup>-6</sup> + 1.014 · 10 <sup>-4</sup> · v <sup>1/2</sup> | 0.997                   |
| c1   | ipc1(A) = -6.866 · 10 <sup>-7</sup> - 1.477 · 10 <sup>-4</sup> · v <sup>1/2</sup> | -0.995                  |

**Table S7.** Equations for the dependences of peak potential (Ep) and peak current (ip) on the scan rate v (in V/s) and their correlation coefficients for a1, a1' and c1 peaks, according to Figure 8a ([Ni(II)L] = 0.4 mM).

| Peak | Equation Ep (V) vs log v(V/s)/ ip(A) vs v <sup>1/2</sup> | Correlation coefficient |
|------|----------------------------------------------------------|-------------------------|
| a1   | Epa1 (V) = 0.819 + 0.110 · log v                         | 0.976                   |
| a1'  | Epa1' (V) = -0.911 + 0.773 · log v                       | -0.911                  |
| c1   | Epc1 (V) = -1.827 - 0.016 · log v                        | -0.970                  |

**Table S8.** Equations for the dependences of peak current (ip) on the square root of the scan rate v (in V/s) and their correlation coefficients for a1, a1' and c1 peaks, according to Figure 8b ([Ni(II)L] = 0.4 mM).

| Peak | Equation (ip(A) = ai + bi · v <sup>1/2</sup> ; v in V/s)                          | Correlation coefficient |
|------|-----------------------------------------------------------------------------------|-------------------------|
| a1   | ipa1(A) = 1.995 · 10 <sup>-6</sup> + 1.988 · 10 <sup>-4</sup> · v <sup>1/2</sup>  | 0.999                   |
| a1'  | ipa1'(A) = 1.409 · 10 <sup>-5</sup> - 1.091 · 10 <sup>-4</sup> · v <sup>1/2</sup> | -0.985                  |
| c1   | ipc1(A) = -3.237 · 10 <sup>-7</sup> - 5.576 · 10 <sup>-5</sup> · v <sup>1/2</sup> | -0.997                  |

**Table S9.** Equations for the dependences of a1 and a1' peaks potentials on the logarithm of the scan rate in CVs performed at different anodic limits.

| Anodic limit scan (V) | Peak | Equation for Ep (V) vs log v      | Correlation coefficient |
|-----------------------|------|-----------------------------------|-------------------------|
| 0.7                   | a1   | -                                 |                         |
| 0.9                   | a1   | Epa1 (V) = 0.821 + 0.074 · log v  | 0.981                   |
| 1.12                  | a1   | Epa1 (V) = 0.820 + 0.113 · log v  | 0.972                   |
| 0.7                   | a1'  | Epa1' (V) = 0.366 + 0.007 · log v | 0.995                   |
| 0.9                   | a1'  | Epa1' (V) = 0.338 - 0.024 · log v | -0.937                  |
| 1.12                  | a1'  | Epa1' (V) = 0.343 - 0.023 · log v | -0.784                  |

**Table S10.** Equations for the dependences of peak current on the square root of the scan rate (in V/s) in CVs performed at different anodic limits ( $[\text{Ni(II)L}] = 0.4 \text{ mM}$ ).

| Anodic limit scan (V) | Peak | Equation for $i_p(\text{A})$ vs $v^{1/2}$                                      | Correlation coefficient |
|-----------------------|------|--------------------------------------------------------------------------------|-------------------------|
| 0.7                   | a1   | --                                                                             |                         |
| 0.9                   | a1   | $i_{p1}(\text{A}) = 2.401 \cdot 10^{-6} + 2.171 \cdot 10^{-4} \cdot v^{1/2}$   | 0.999                   |
| 1.12                  | a1   | $i_{p1}(\text{A}) = 1.792 \cdot 10^{-6} + 1.997 \cdot 10^{-4} \cdot v^{1/2}$   | 0.999                   |
| 0.7                   | a1'  | $i_{p1'}(\text{A}) = -4.897 \cdot 10^{-8} - 8.079 \cdot 10^{-6} \cdot v^{1/2}$ | -0.992                  |
| 0.9                   | a1'  | $i_{p1'}(\text{A}) = 6.113 \cdot 10^{-6} - 6.637 \cdot 10^{-5} \cdot v^{1/2}$  | -0.993                  |
| 1.12                  | a1'  | $i_{p1'}(\text{A}) = 1.404 \cdot 10^{-5} - 1.095 \cdot 10^{-4} \cdot v^{1/2}$  | -0.985                  |

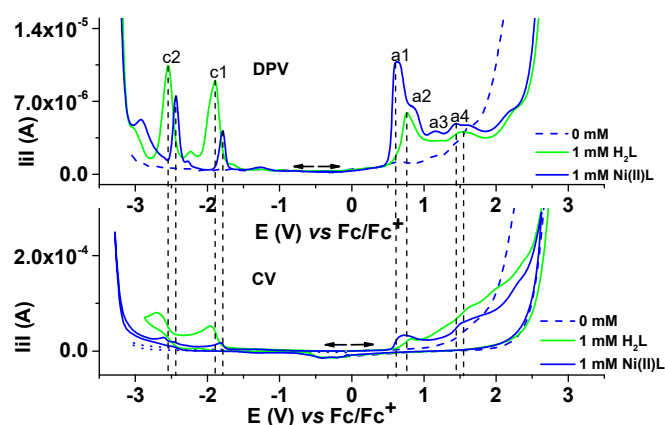

**Figure S1.** Anodic and cathodic DPV (up) and CV 0.1 V/s (down) curves on GC of  $\text{H}_2\text{L}$  and  $\text{Ni(II)L}$  complex superimposed at 1 mM concentrations in 0.1 M TBAP/ $\text{CH}_3\text{CN}$ ; the cathodic currents are shown in absolute values.

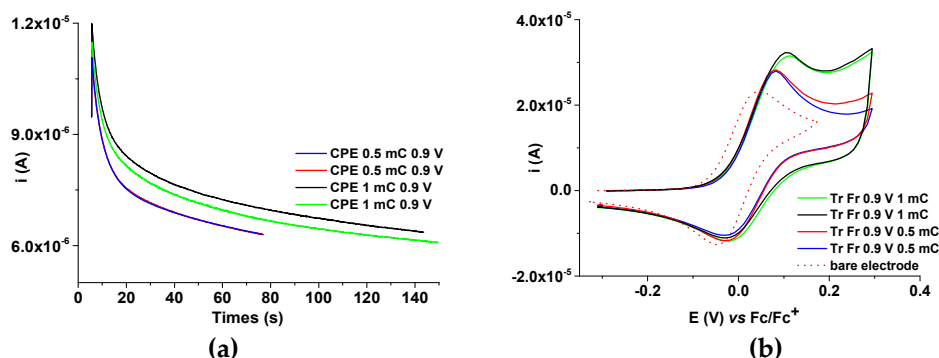

**Figure S2.** (a) Chronoamperograms during the preparation of  $\text{Ni(II)L}$ -CMEs in 0.4 mM solution of  $\text{Ni(II)L}$  in 0.1 M TBAP/ $\text{CH}_3\text{CN}$ , by CPE at different charges; (b) CV curves (0.1 V/s) after their transfer in ferrocene solution (1 mM) in 0.1 M TBAP/ $\text{CH}_3\text{CN}$  vs. bare electrode.

(a)  
0.7 V

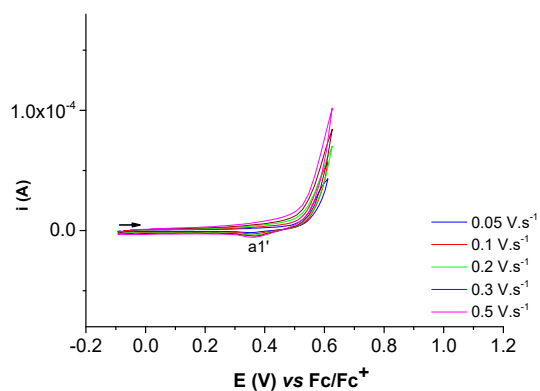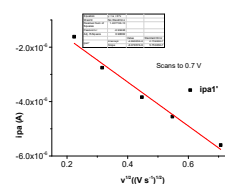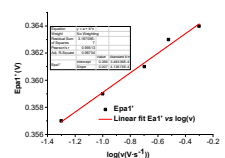

(b)  
0.9 V

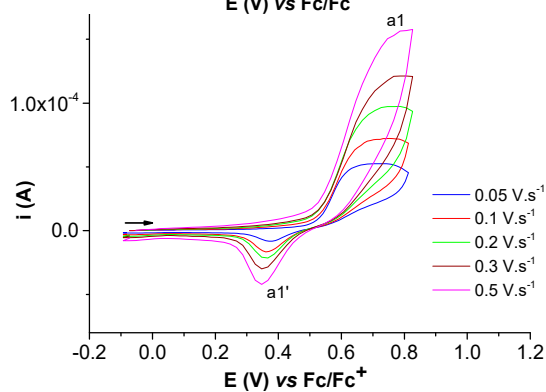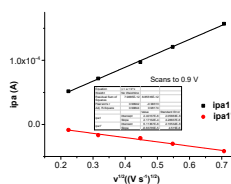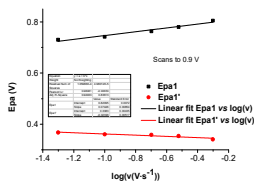

(c)  
1.13 V

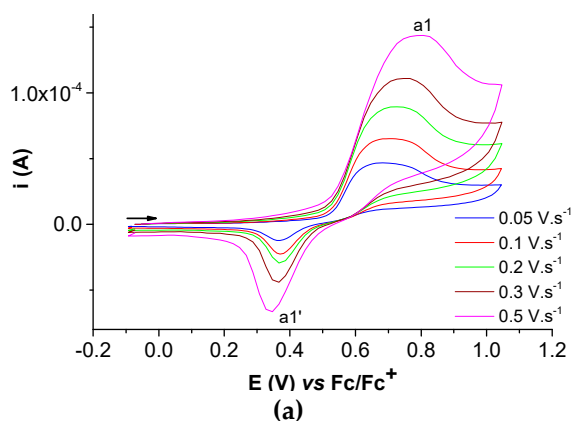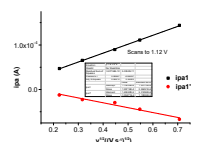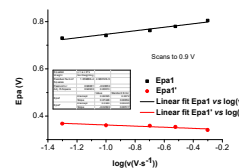

(b)

**Figure S3.** (a) Anodic cyclic voltammograms with anodic scan limits (*vs.* RE) of 0.7 V (a), 0.9 V (b), 1.13 V (c) at different scan rates for solution of  $[Ni(II)L] = 0.4$  mM in 0.1 M TBAP/ $CH_3CN$ ; (b) linear dependences of  $a1$  and  $a1'$  peaks currents on the square root of the scan rate, and linear dependences of  $a1$  and  $a1'$  peaks potentials on the logarithm of the scan rate.
